# Supplementary material
Source: PubMed Central journal article supplement (PMC5528561)

### S.1A

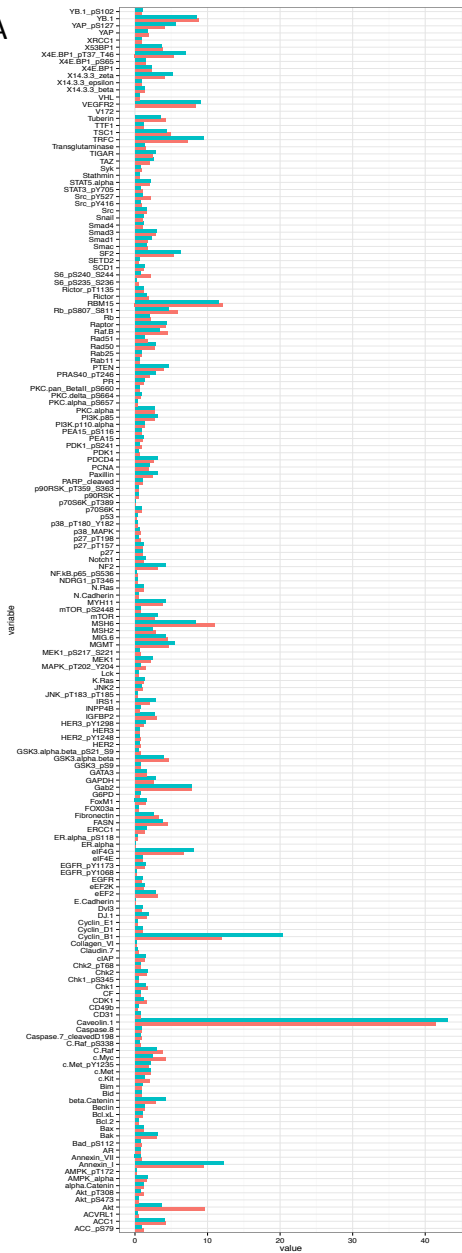

### S.1B

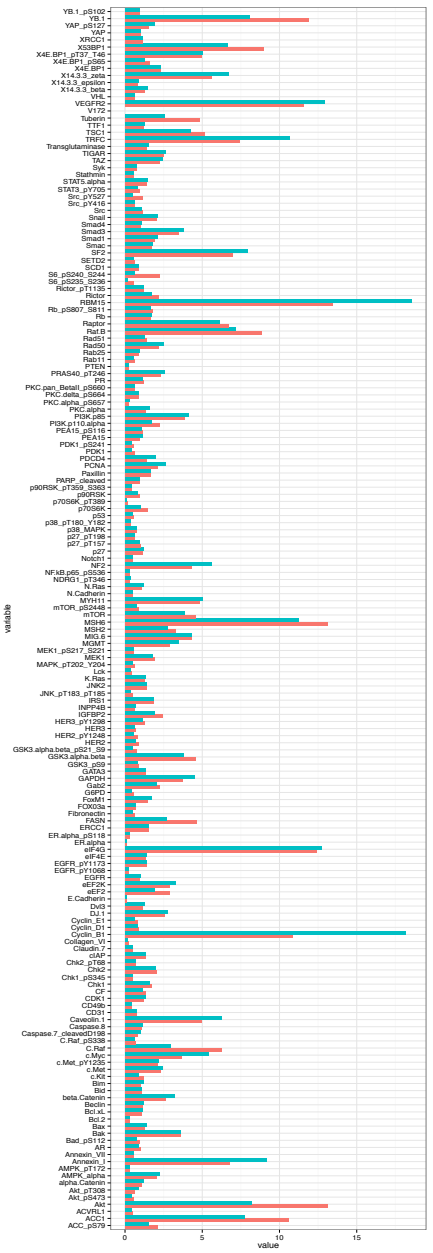

### S.1C

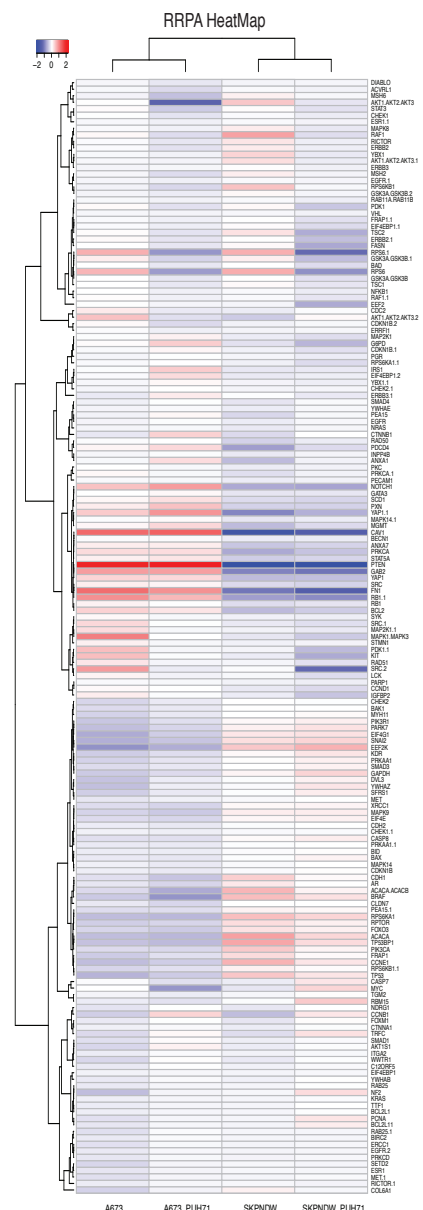

# S.1D

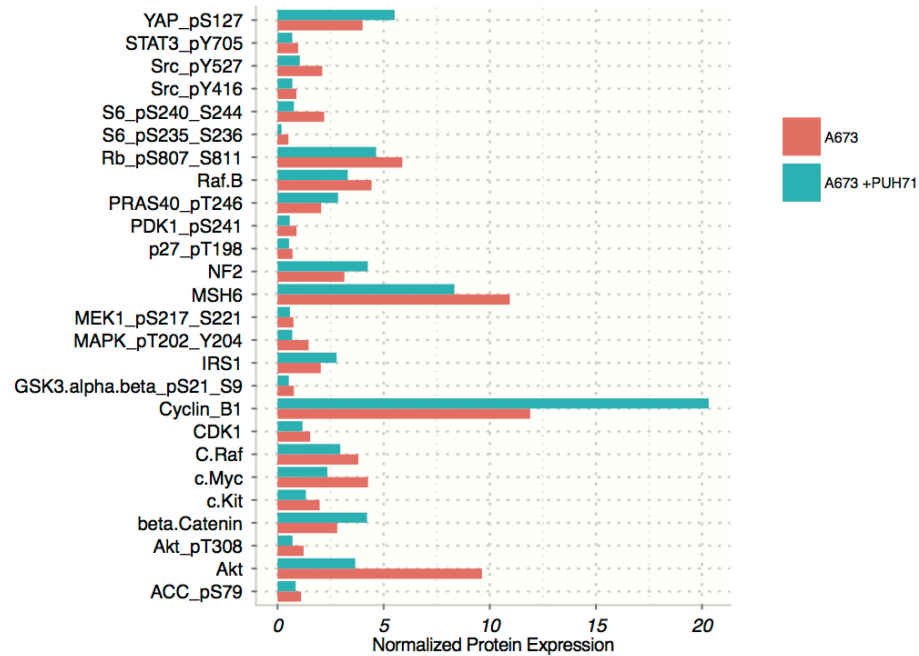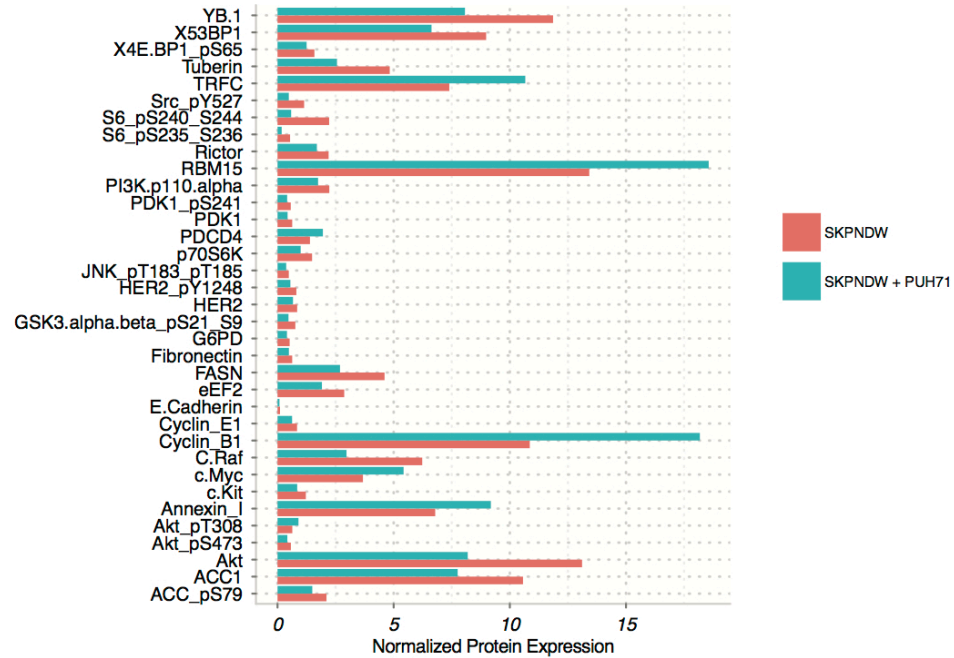

Supplement: MOL2-8-323-s001.pdf [file MOL2-8-323-s001.pdf]
